# Supplementary material
Source: publisher figshare collection journal article supplement (https://acs.figshare.com/ndownloader/files/18666128)
Supplement: Supplementary file 1 [file 18666128]

## Supporting Information

### High-temperature Fischer–Tropsch synthesis of light olefins over nano-Fe<sub>3</sub>O<sub>4</sub>@MnO<sub>2</sub> core-shell catalysts

Xian Wu<sup>1</sup>, Hongfang Ma<sup>1</sup>, Haitao Zhang<sup>1</sup>, Weixin Qian<sup>1, \*</sup>, Dianhua Liu<sup>1</sup>, Qiwen Sun<sup>2</sup>, Weiyong Ying<sup>1</sup>

<sup>1</sup>Engineering Research Center of Large Scale Reactor Engineering and Technology, Ministry of Education, State Key Laboratory of Chemical Engineering, East China University of Science and Technology, Shanghai 200237, China

<sup>2</sup>State Key Laboratory of Coal Liquefaction and Coal Chemical Technology, Shanghai 201203, China

#### Corresponding Author

\* E-mail: [wxqian@ecust.edu.cn](mailto:wxqian@ecust.edu.cn) (Weixin Qian)

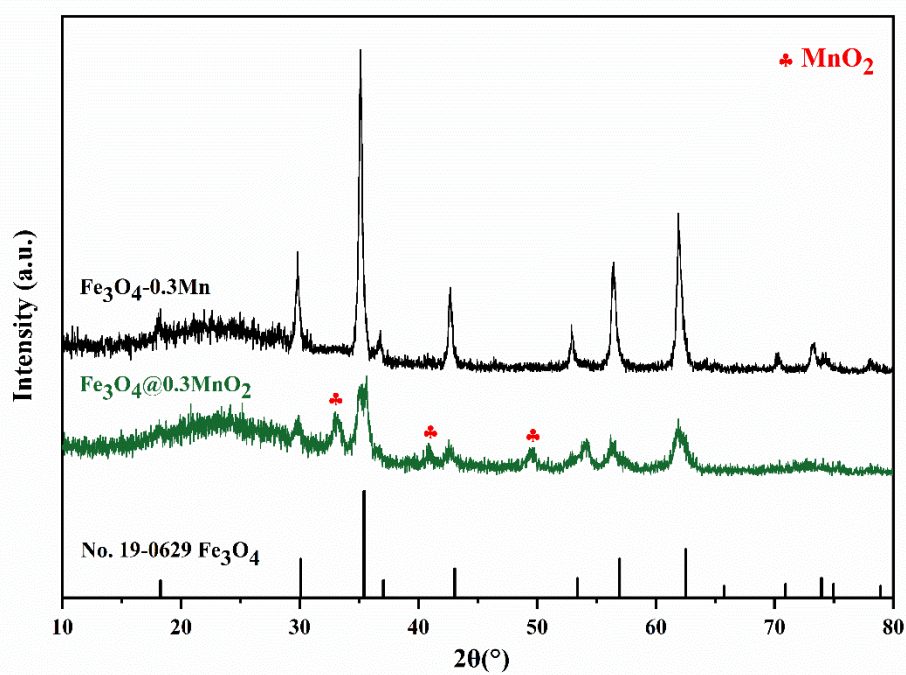

**Figure S1.** XRD patterns of  $\text{Fe}_3\text{O}_4\text{-}0.3\text{Mn}$  and  $\text{Fe}_3\text{O}_4\text{@}0.3\text{MnO}_2$  after heat treatment.

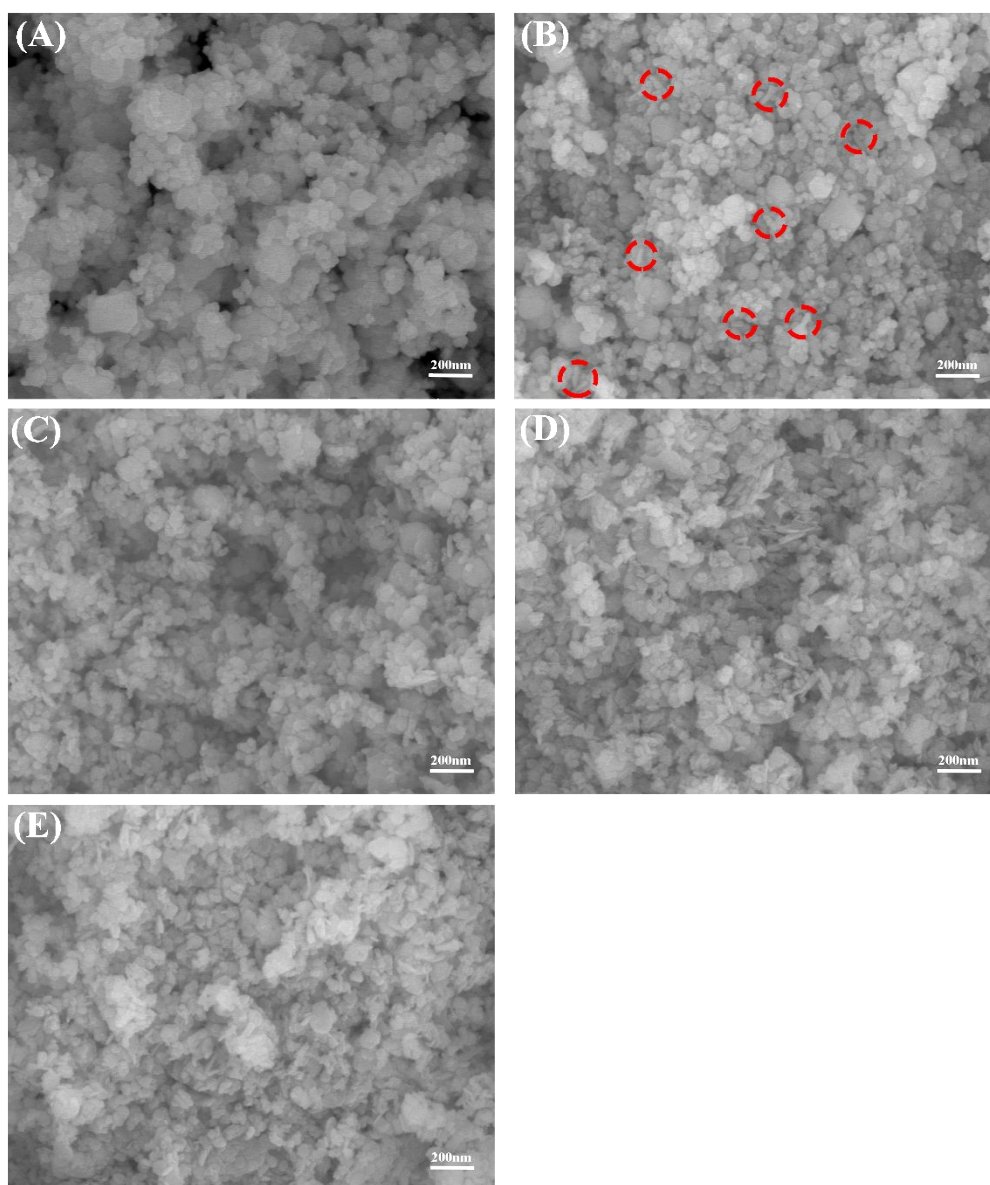

**Figure S2.** SEM images of as-synthesized samples (A)  $\text{Fe}_3\text{O}_4$ ; (B)  $\text{Fe}_3\text{O}_4@0.1\text{MnO}_2$ ; (C)  $\text{Fe}_3\text{O}_4@0.2\text{MnO}_2$ ; (D)  $\text{Fe}_3\text{O}_4@0.3\text{MnO}_2$ ; (E)  $\text{Fe}_3\text{O}_4@0.4\text{MnO}_2$ .

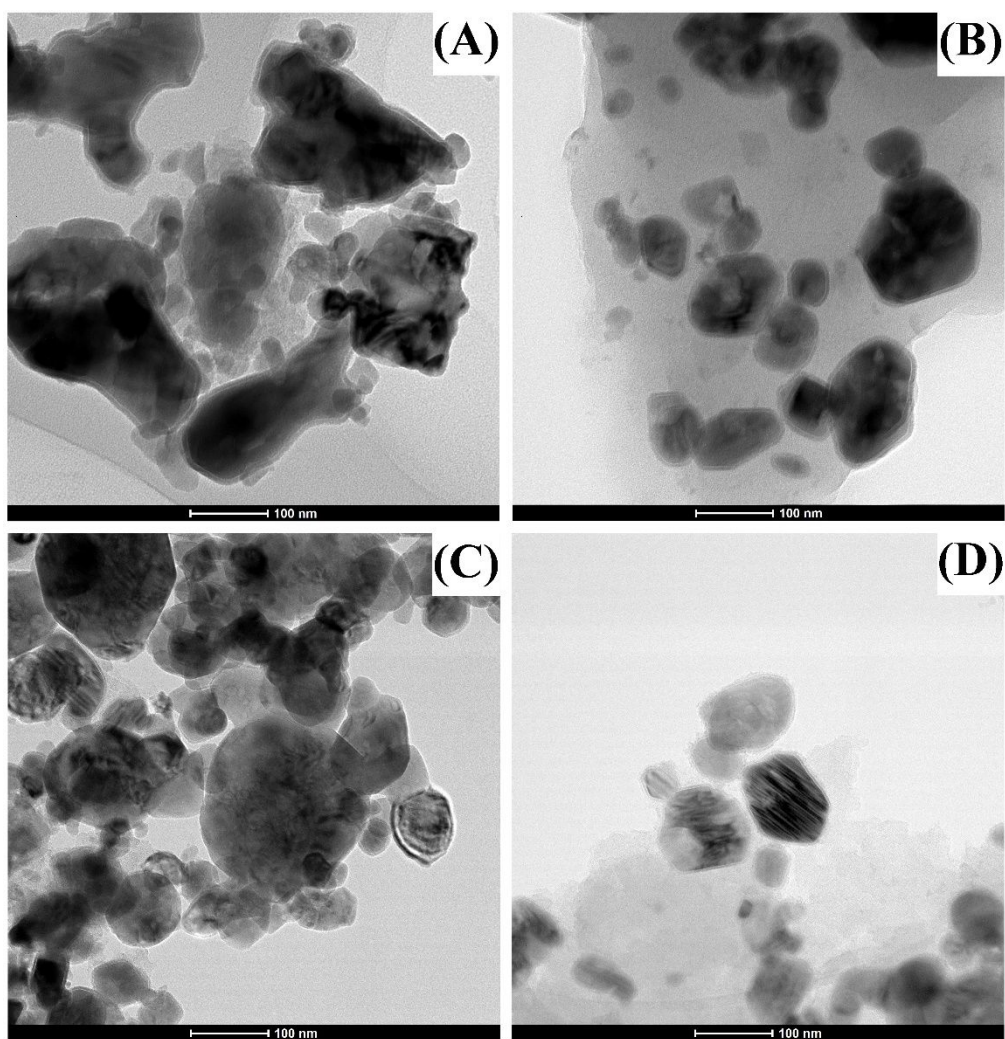

**Figure S3.** HRTEM images of spent catalysts (A)  $\text{Fe}_3\text{O}_4$  after 48 h reaction; (B)  $\text{Fe}_3\text{O}_4@0.3\text{MnO}_2$  after 48 h reaction; (C)  $\text{Fe}_3\text{O}_4-0.3\text{Mn}$  after 48 h reaction; (D)  $\text{Fe}_3\text{O}_4@0.3\text{MnO}_2$  after 288 h reaction.



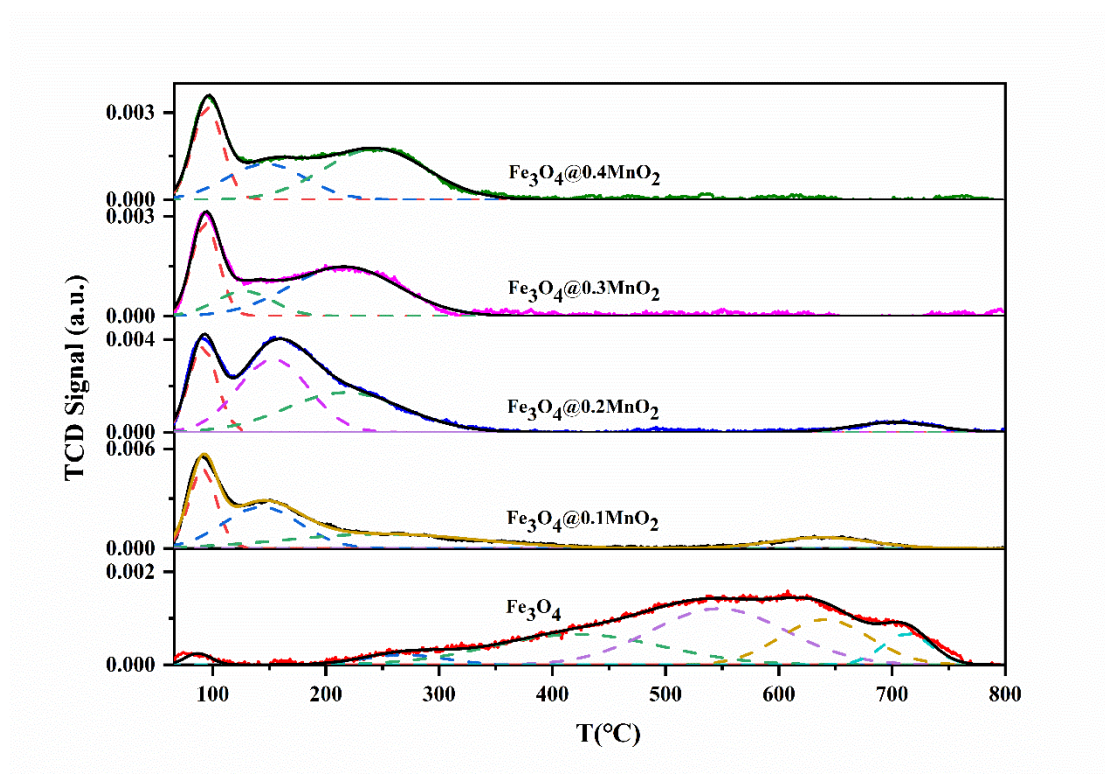

**Figure S4.** Fitting results of H<sub>2</sub>-TPD.

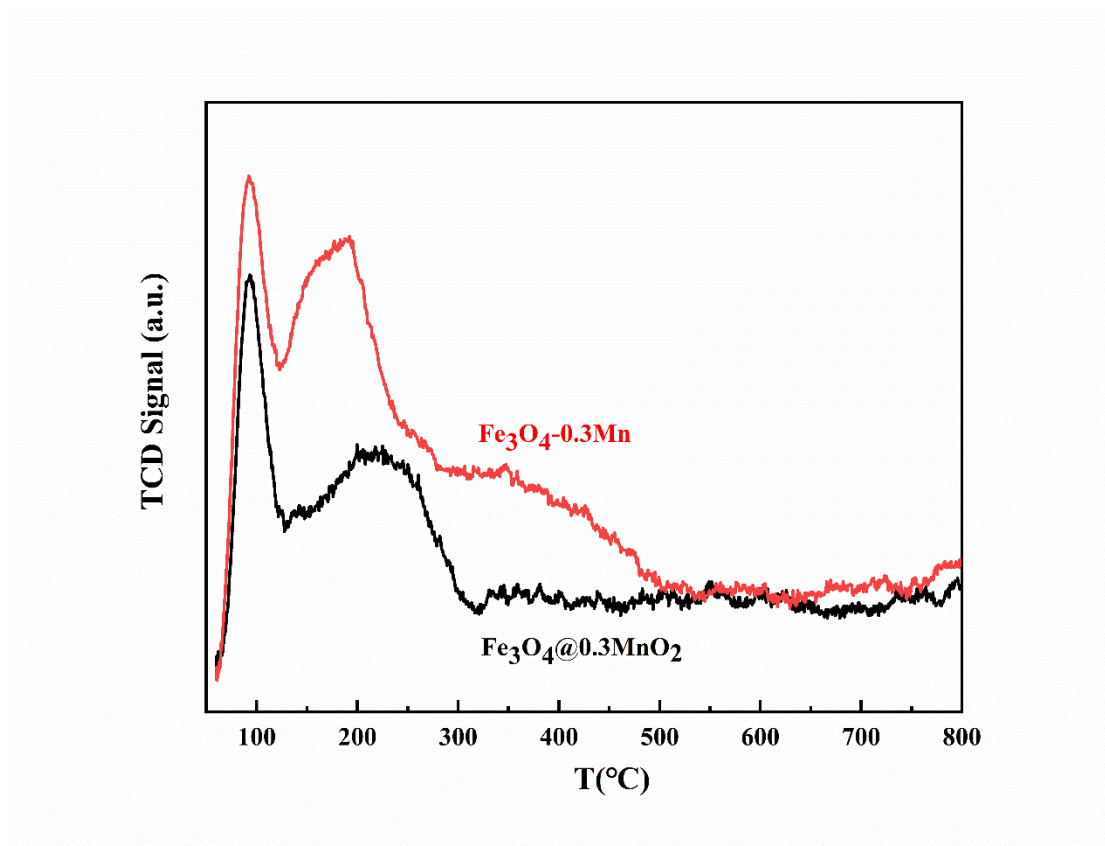

**Figure S5.** H<sub>2</sub>-TPD profiles of H<sub>2</sub>-reduced Fe<sub>3</sub>O<sub>4</sub>-0.3Mn and Fe<sub>3</sub>O<sub>4</sub>@0.3MnO<sub>2</sub> catalysts.

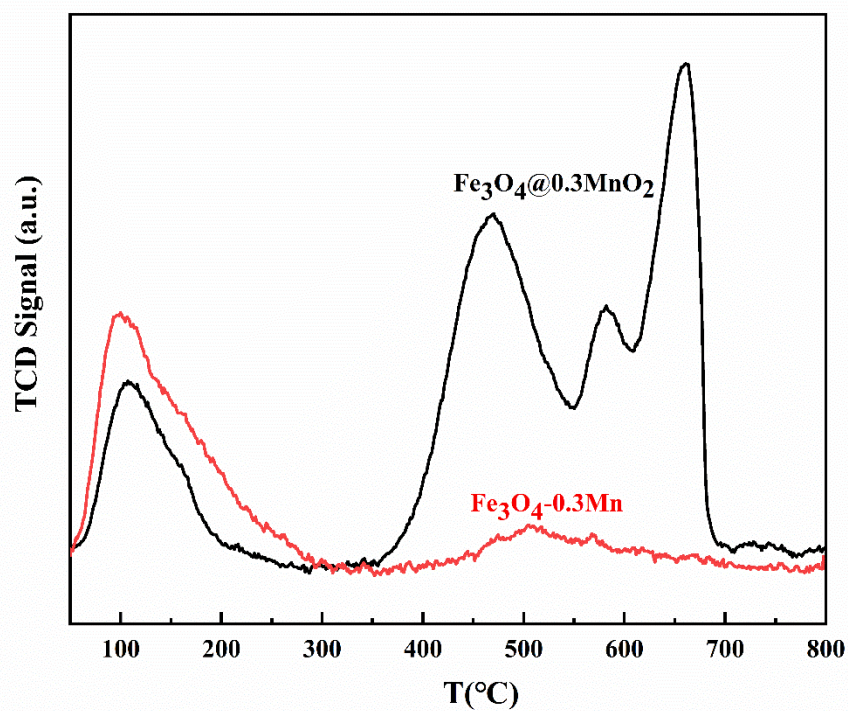

**Figure S6.** CO-TPD profiles of H<sub>2</sub>-reduced Fe<sub>3</sub>O<sub>4</sub>-0.3Mn and Fe<sub>3</sub>O<sub>4</sub>@0.3MnO<sub>2</sub> catalysts.

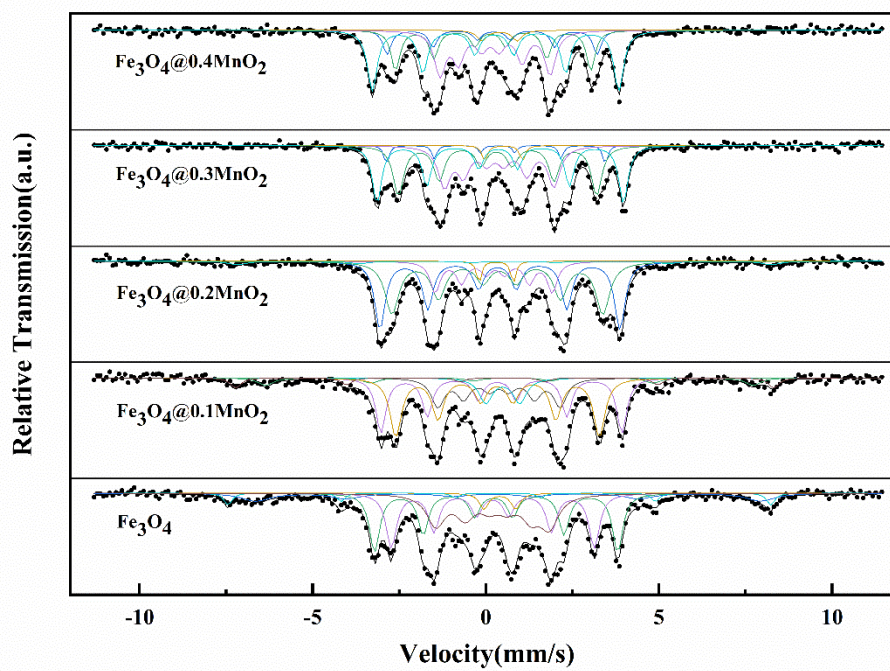

**Figure S7.** Mössbauer spectrum of the samples after reaction. Reaction condition: 340 °C, H<sub>2</sub>/CO=2, 1.5 MPa, 11000 mL/(h·g<sub>Cat</sub>), 48 h.



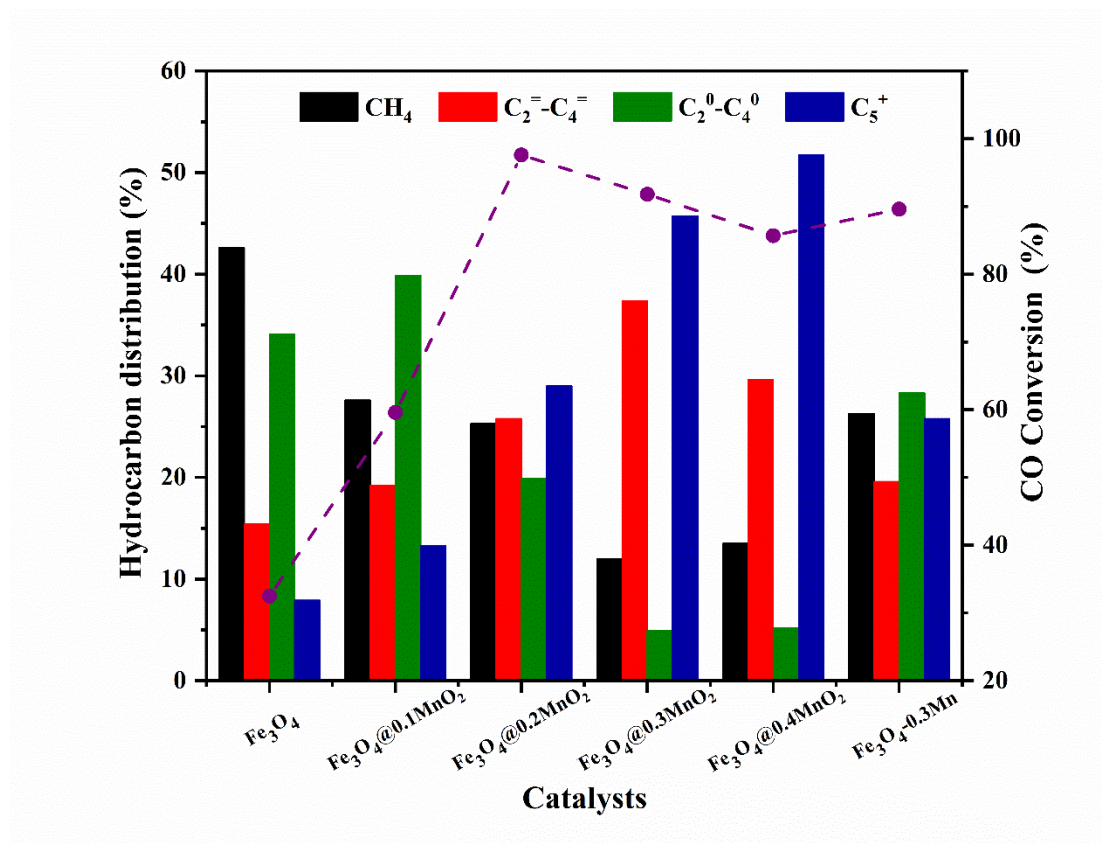

**Figure S8.** Hydrocarbon distribution and CO conversion based on the product distribution after 48 h on stream. (the bars are stacked)

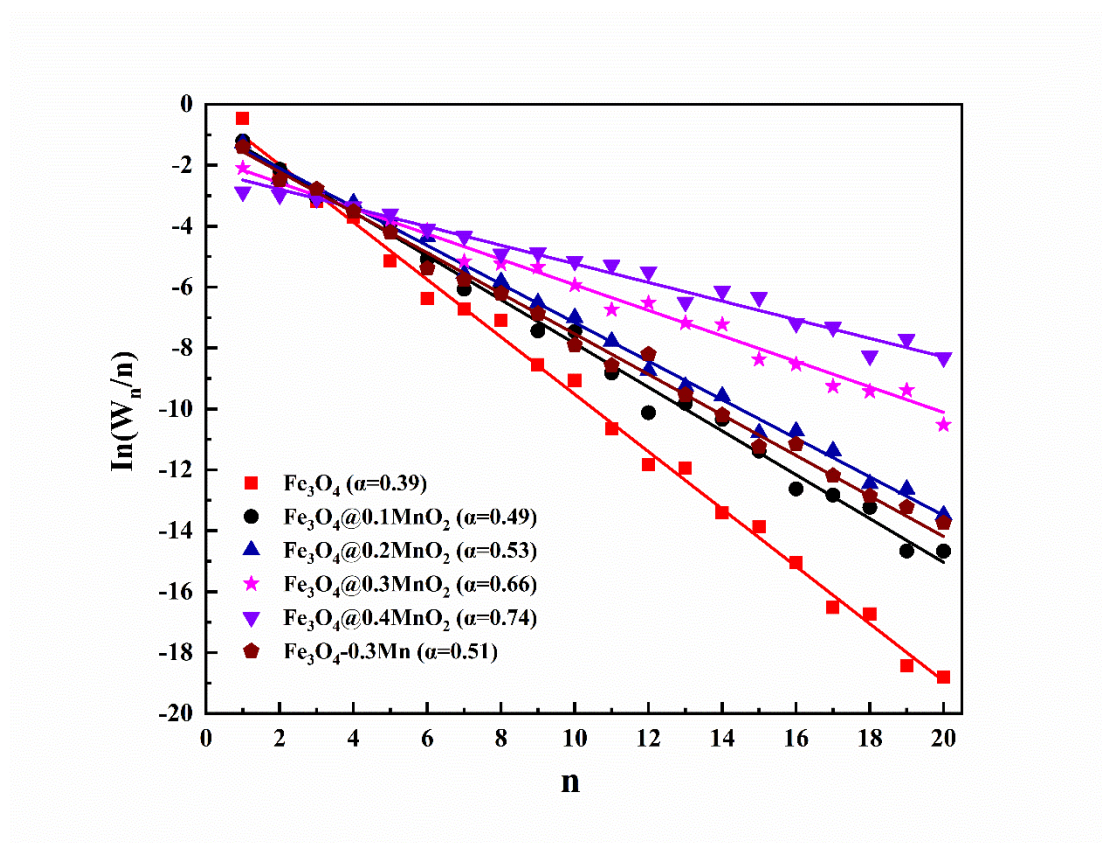

**Figure S9.** ASF plot of the catalysts based on the product distribution after 48 h on stream.

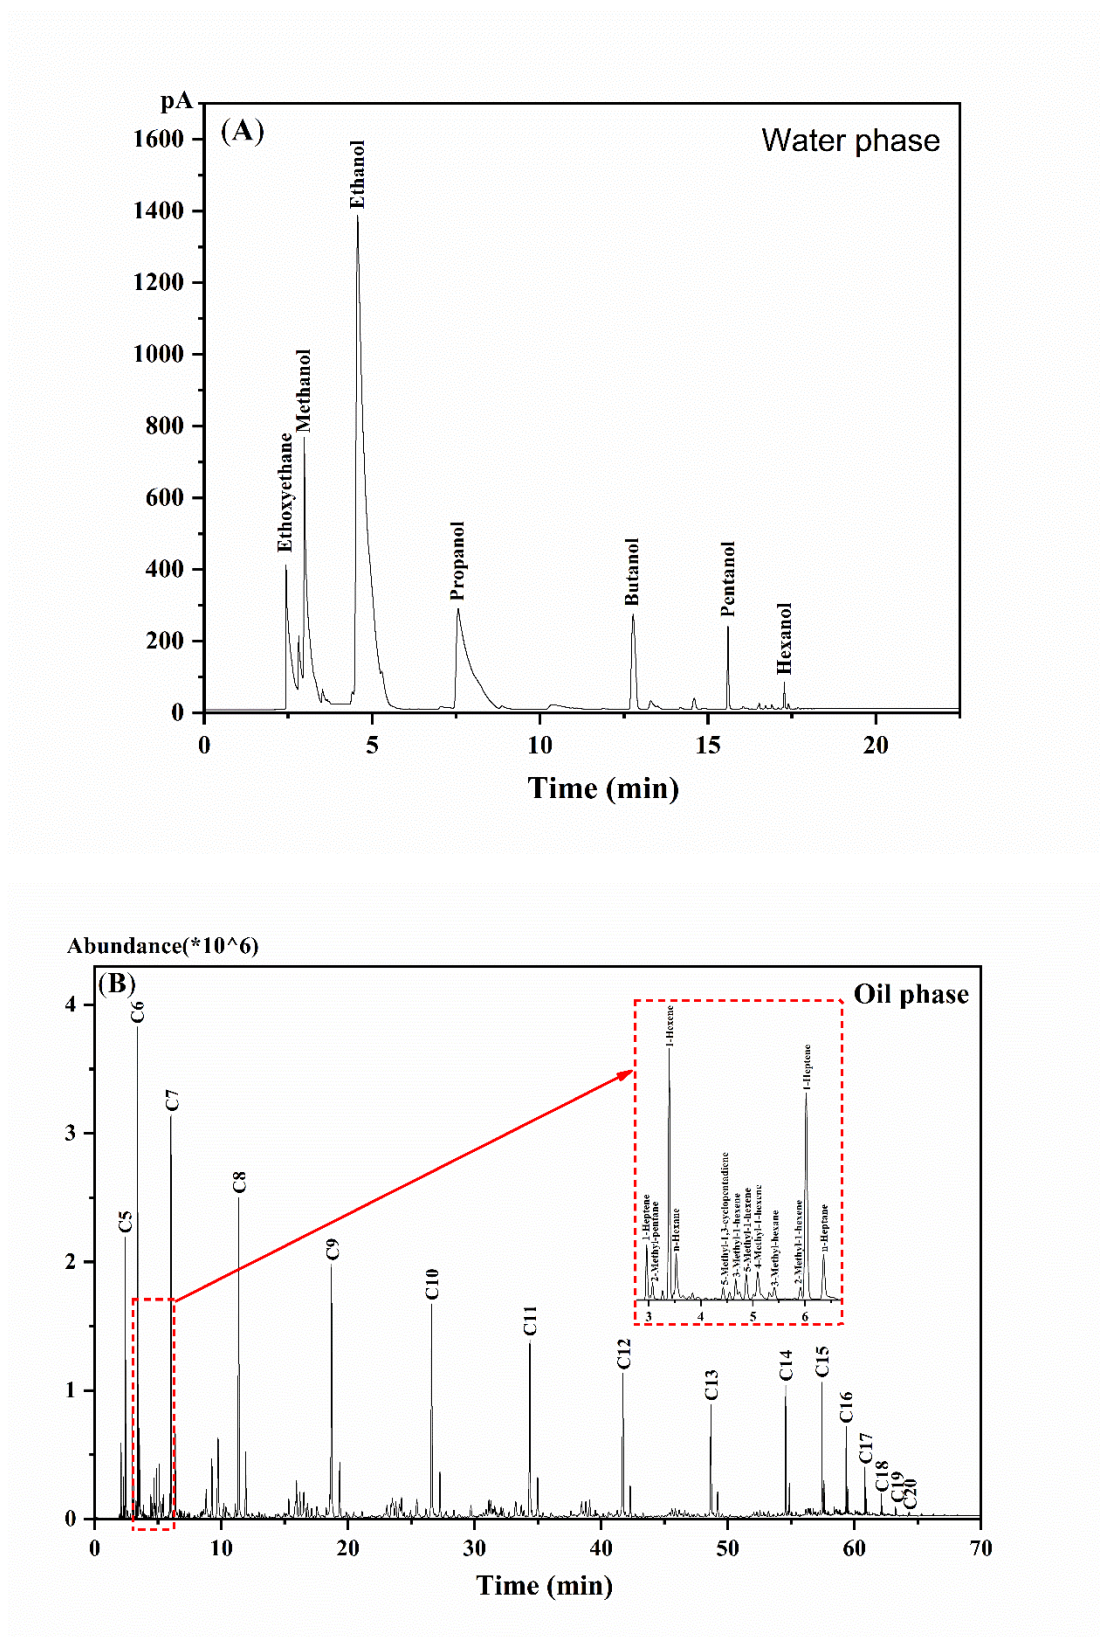



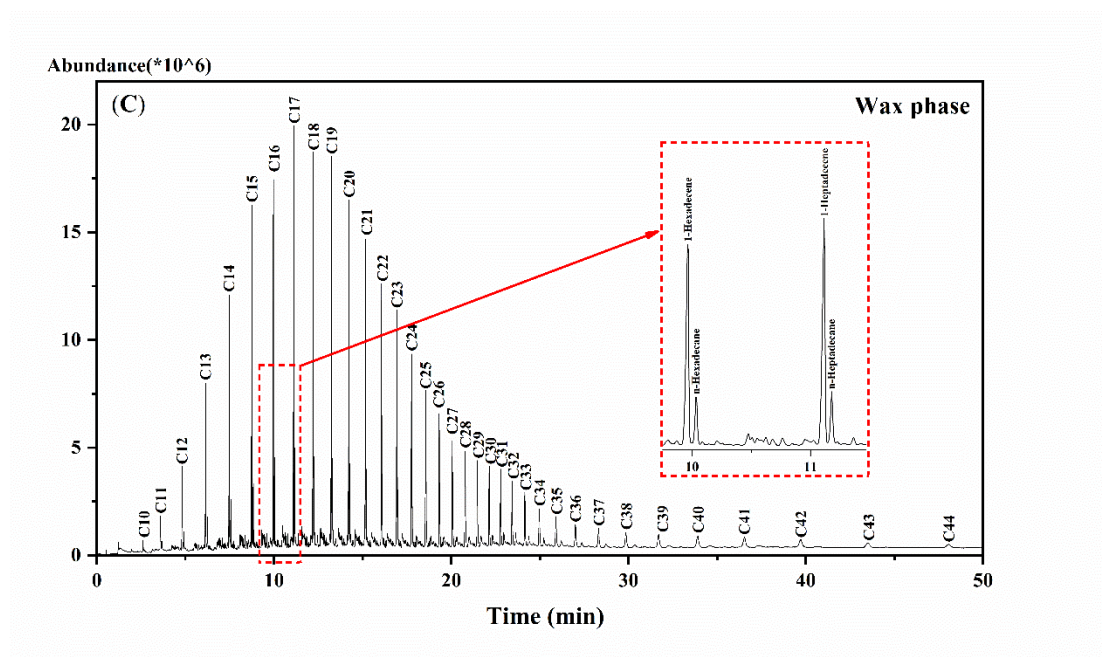

**Figure S10.** Typical GC-MS result of the liquid products: (A) Water phase; (B) Oil phase; (C) Wax phase.
